# Supplementary material for: Individual Scent-Marks of Nest Entrances in the Solitary Bee, Osmia cornuta (Hymenoptera: Apoidea)
Source: MDPI journal article supplement (doi:10.3390/insects12090843), 2021-09-18
Supplement: s1 [file s1]

# Individual scent-marks of nest entrances in the solitary bee, *Osmia cornuta* (Hymenoptera: Apoidea)

Konrad Sebastian Frahnert and Karsten Seidelmann

**Table S1.** Substances identified in nest marks of *O. cornuta*, extracted by hexane from filter pater sleeves.

| Peak | Tag           | Name                                 | Formula                                        | Mol. Mass | RT <sup>1</sup> [min] | KI <sup>2</sup> |
|------|---------------|--------------------------------------|------------------------------------------------|-----------|-----------------------|-----------------|
| 3    | C17:0         | n-Heptadecane                        | C <sub>17</sub> H <sub>36</sub>                | 240.47    | 7.230                 | 1700            |
| 4    | C15:0-Ald     | Pentadecanal                         | C <sub>15</sub> H <sub>30</sub> O              | 226.40    | 7.373                 | 1715            |
| 6    | C14:0-EE      | Tetradecanoic acid ethyl ester       | C <sub>16</sub> H <sub>32</sub> O <sub>2</sub> | 256.42    | 8.055                 | 1791            |
| 7    | C16:0-Ald     | Hexadecanal                          | C <sub>16</sub> H <sub>32</sub> O              | 240.43    | 8.328                 | 1819            |
| 8    | Met-C15-2-one | 6.10.14-Trimethyl-pentadecan-2-one   | C <sub>18</sub> H <sub>36</sub> O              | 268.28    | 8.481                 | 1833            |
| 10   | 9-C19:1       | (Z)-9-Nonadecene                     | C <sub>19</sub> H <sub>38</sub>                | 266.51    | 8.916                 | 1875            |
| 11   | 7-C19:1       | (Z)-7-Nonadecene                     | C <sub>19</sub> H <sub>38</sub>                | 266.51    | 8.980                 | 1881            |
| 12   | C19:0         | n-Nonadecane                         | C <sub>19</sub> H <sub>40</sub>                | 268.52    | 9.171                 | 1900            |
| 14   | C17:0-Ald     | Heptadecanal                         | C <sub>17</sub> H <sub>34</sub> O              | 254.45    | 9.408                 | 1920            |
| 16   | 9-C16:1-EE    | (Z)-9-Hexadecen acid ethyl ester     | C <sub>18</sub> H <sub>34</sub> O <sub>2</sub> | 282.46    | 10.007                | 1970            |
| 17   | C16:0-EE      | Hexadecanoic acid ethyl ester        | C <sub>18</sub> H <sub>36</sub> O <sub>2</sub> | 284.48    | 10.261                | 1992            |
| 18   | 9-C16:1-IPE   | (Z)-9-Hexadecen acid isopropyl ester | C <sub>19</sub> H <sub>36</sub> O <sub>2</sub> | 296.49    | 10.347                | 1999            |
| 19   | Met-HC 1      | methyl-branched Hydrocarbon          |                                                |           | 10.467                | 2014            |
| 20   | C16:0-IPE     | Hexadecanoic acid isopropyl ester    | C <sub>19</sub> H <sub>38</sub> O <sub>2</sub> | 398.50    | 10.578                | 2017            |
| 21   | C18:0-Ald     | Octadecanal                          | C <sub>18</sub> H <sub>36</sub> O              | 268.48    | 10.633                | 2021            |
| 22   | 9-C21:1       | (Z)-9-Heneicosane                    | C <sub>21</sub> H <sub>42</sub>                | 294.56    | 11.292                | 2072            |
| 23   | 7-C21:1       | (Z)-7-Hentricosene                   | C <sub>21</sub> H <sub>42</sub>                | 294.56    | 11.374                | 2079            |
| 24   | 9.12-C18:2-ME | Methyl (Z,Z)-9.12-octadecadienoate   | C <sub>19</sub> H <sub>34</sub> O <sub>2</sub> | 294.48    | 11.544                | 2092            |
| 25   | C21:0         | n-Heneicosane                        | C <sub>21</sub> H <sub>44</sub>                | 296.57    | 11.641                | 2100            |
| 26   | C21:0-One     | Nonadecan-2-one                      | C <sub>19</sub> H <sub>38</sub> O              | 282.50    | 11.703                | 2104            |
| 27   | C19:0-Ald     | Nonadecanal                          | C <sub>19</sub> H <sub>38</sub> O              | 282.50    | 11.967                | 2123            |
| 28   | 9-C18:1-OOH   | (Z)-9-octadecenoic acid              | C <sub>18</sub> H <sub>34</sub> O <sub>2</sub> | 282.47    | 12.144                | 2136            |
| 29   | 9.12-C18:2-EE | Ethyl (9Z,12Z)-9.12-octadecadienoate | C <sub>20</sub> H <sub>36</sub> O <sub>2</sub> | 308.50    | 12.463                | 2159            |
| 30   | C18:1-EE      | Ethyl (Z)-9-octadecenoate            | C <sub>20</sub> H <sub>38</sub> O <sub>2</sub> | 310.51    | 12.552                | 2165            |
| 31   | C18:0-EE      | Ethyl octadecenoate                  | C <sub>20</sub> H <sub>40</sub> O <sub>2</sub> | 312.53    | 12.907                | 2191            |
| 32   | C22:0         | n-Docosane                           | C <sub>22</sub> H <sub>46</sub>                | 310.60    | 13.017                | 2200            |
| 33   | C20:0-Ald     | Eicosanal                            | C <sub>20</sub> H <sub>40</sub> O              | 296.53    | 13.385                | 2225            |
| 35   | 9-C20:1-1-OH  | (Z)-9-Eicosen-1-ol                   | C <sub>20</sub> H <sub>40</sub> O              | 296.53    | 13.988                | 2267            |
| 36   | 9-C23:1       | (Z)-9-Tricosene                      | C <sub>23</sub> H <sub>46</sub>                | 322.61    | 14.076                | 2273            |
| 37   | 7-C23:1       | (Z)-7-Tricosene                      | C <sub>23</sub> H <sub>46</sub>                | 322.61    | 14.171                | 2280            |
| 38   | Met-HC 2      | methyl-branched Hydrocarbon          |                                                |           | 14.310                | 2289            |
| 39   | 5-C23:1       | (Z)-5-Tricosene                      | C <sub>23</sub> H <sub>46</sub>                | 322.61    | 14.310                | 2289            |
| 40   | C23:0         | n-Tricosane                          | C <sub>23</sub> H <sub>48</sub>                | 324.63    | 14.457                | 2300            |
| 41   | C21:0-Ald     | Heneicosanal                         | C <sub>21</sub> H <sub>42</sub> O              | 310.56    | 14.838                | 2326            |
| 42   | C20:1-EE      | Ethyl (Z)-9-icosenoate               | C <sub>22</sub> H <sub>42</sub> O <sub>2</sub> | 338.57    | 15.371                | 2362            |
| 43   | 9-C24:1       | (Z)-9-Tetracosene                    | C <sub>24</sub> H <sub>48</sub>                | 336.64    | 15.520                | 2373            |

| Peak | Tag              | Name                            | Formula                                        | Mol. Mass | RT <sup>1</sup> [min] | KI <sup>2</sup> |
|------|------------------|---------------------------------|------------------------------------------------|-----------|-----------------------|-----------------|
| 44   | 7-C24:1          | (Z)-7-Tetracosene               | C <sub>24</sub> H <sub>48</sub>                | 336.64    | 15.629                | 2380            |
| 45   | C24:0            | n-Tetracosane                   | C <sub>24</sub> H <sub>50</sub>                | 338.65    | 15.910                | 2400            |
| 46   | 9.12-C18:2-BE    | Butyl-9.12-octadecadienoate     | C <sub>22</sub> H <sub>40</sub> O <sub>2</sub> | 336.55    | 16.082                | 2411            |
| 47   | 9.12.15-C18:3-BE | Butyl-9.12.15-octadecatrienoate | C <sub>22</sub> H <sub>38</sub> O <sub>2</sub> | 334.54    | 16.192                | 2419            |
| 48   | C22:0-Ald        | Docosanal                       | C <sub>22</sub> H <sub>44</sub> O              | 324.58    | 16.328                | 2428            |
| 49   | 9-C22:1-1-OH     | 9-Docosenol                     | C <sub>22</sub> H <sub>44</sub> O              | 324.58    | 16.898                | 2467            |
| 50   | 9-C25:1          | (Z)-9-Pentacosene               | C <sub>25</sub> H <sub>50</sub>                | 350.66    | 16.991                | 2474            |
| 51   | 7-C25:1          | (Z)-7-Pentacosene               | C <sub>25</sub> H <sub>50</sub>                | 350.66    | 17.136                | 2484            |
| 52   | 5-C25:1          | (Z)-5-Pentacosene               | C <sub>25</sub> H <sub>50</sub>                | 350.66    | 17.261                | 2492            |
| 53   | C25:0            | n-Pentacosane                   | C <sub>25</sub> H <sub>52</sub>                | 352.68    | 17.375                | 2500            |
| 54   | 9-C23:1-1-OH     | (Z)-9-Tricosene-1-ol            | C <sub>23</sub> H <sub>46</sub> O              | 338.61    | 18.419                | 2573            |
| 55   | 9-C26:1          | (Z)-9-Hexacosene                | C <sub>26</sub> H <sub>52</sub>                | 364.69    | 18.432                | 2574            |
| 56   | 7-C26:1          | (Z)-7-Hexacosene                | C <sub>26</sub> H <sub>52</sub>                | 364.69    | 18.542                | 2581            |
| 57   | C26:0            | n-Hexacosane                    | C <sub>26</sub> H <sub>54</sub>                | 366.71    | 18.809                | 2600            |
| 58   | C24:0-Ald        | Tetracosanal                    | C <sub>24</sub> H <sub>48</sub> O              | 352.64    | 19.266                | 2632            |
| 59   | Met-HC 3         | methyl-branched Hydrocarbon     |                                                |           | 19.680                | 2661            |
| 60   | 9-C24:1-1-OH     | (Z)-9-Tetracosene-1-ol          | C <sub>24</sub> H <sub>48</sub> O              | 352.64    | 19.809                | 2671            |
| 61   | 9-C27:1          | (Z)-9-Heptacosene               | C <sub>27</sub> H <sub>54</sub>                | 378.72    | 19.866                | 2675            |
| 62   | 7-C27:1          | (Z)-7-Heptacosene               | C <sub>27</sub> H <sub>54</sub>                | 378.72    | 19.979                | 2683            |
| 63   | 5-C27:1          | (Z)-5-Heptacosene               | C <sub>27</sub> H <sub>54</sub>                | 378.72    | 20.121                | 2693            |
| 64   | C27:0            | n-Heptacosane                   | C <sub>27</sub> H <sub>56</sub>                | 380.73    | 20.218                | 2700            |
| 65   | Met-HC 4         | methyl-branched Hydrocarbon     |                                                |           | 21.066                | 2760            |
| 66   | Met-HC 5         | methyl-branched Hydrocarbon     |                                                |           | 21.209                | 2770            |
| 67   | 7-C28:1          | (Z)-7-Octacosene                | C <sub>28</sub> H <sub>56</sub>                | 392.74    | 21.376                | 2783            |
| 68   | C28:0            | n-Octacosane                    | C <sub>28</sub> H <sub>58</sub>                | 394.76    | 21.609                | 2800            |
| 69   | 9-C26:1-1-OH     | (Z)-9-Octacosen-1-ol            | C <sub>28</sub> H <sub>56</sub> O              | 408.74    | 22.445                | 2862            |
| 70   | 9-C29:1          | (Z)-9-Nonacosene                | C <sub>29</sub> H <sub>58</sub>                | 406.77    | 22.618                | 2875            |
| 71   | 7-C29:1          | (Z)-7-Nonacosene                | C <sub>29</sub> H <sub>58</sub>                | 406.77    | 22.737                | 2884            |
| 72   | 5-C29:1          | (Z)-5-Nonacosene                | C <sub>29</sub> H <sub>58</sub>                | 406.77    | 22.866                | 2893            |
| 73   | C29:0            | n-Nonacosane                    | C <sub>29</sub> H <sub>60</sub>                | 408.79    | 22.950                | 2900            |
| 74   | 7-C31:1          | (Z)-7-Hentricosene              | C <sub>31</sub> H <sub>62</sub>                | 434.82    | 25.354                | 3085            |
| 75   | C31:0            | n-Hentricosane                  | C <sub>31</sub> H <sub>64</sub>                | 436.84    | 25.561                | 3100            |

<sup>1</sup> RT = Retention Time

<sup>2</sup> KI = Kovats-Index

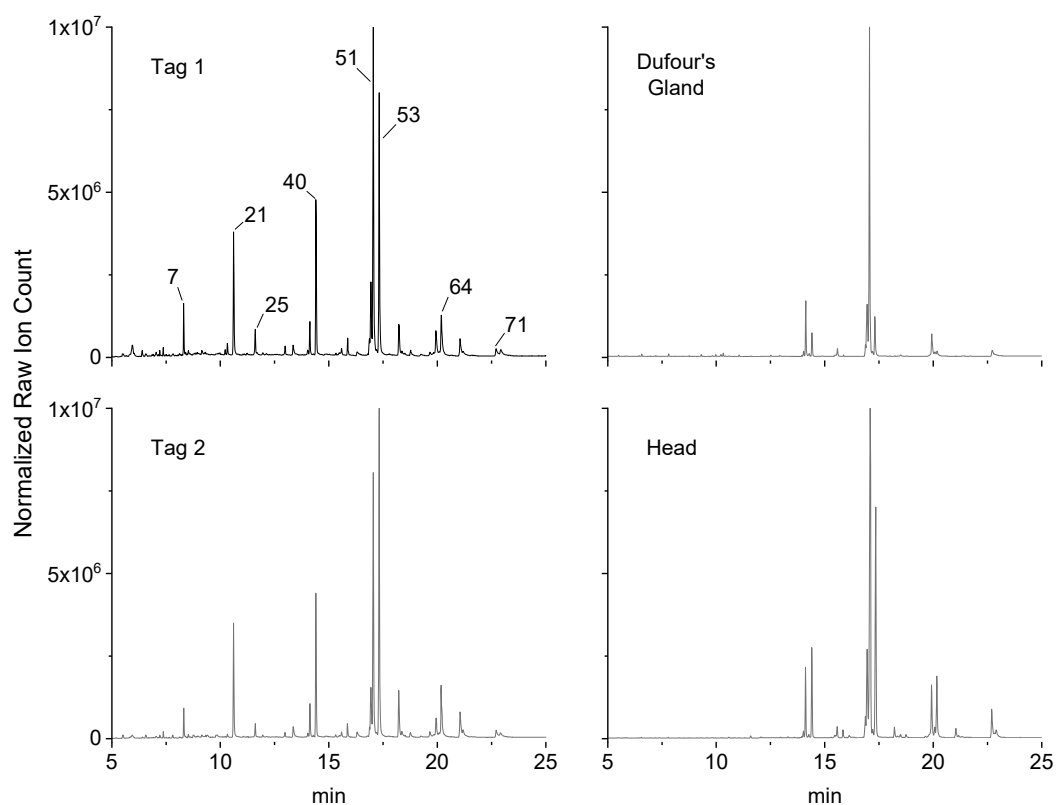

**Figure S1.** Chromatograms of the four-sample set from *O. cornuta* female C11. Chromatograms were normalized to the largest peak. For better orientation, some of the major compounds were marked for Tag 1. Numbers refer to substances in Table S1.

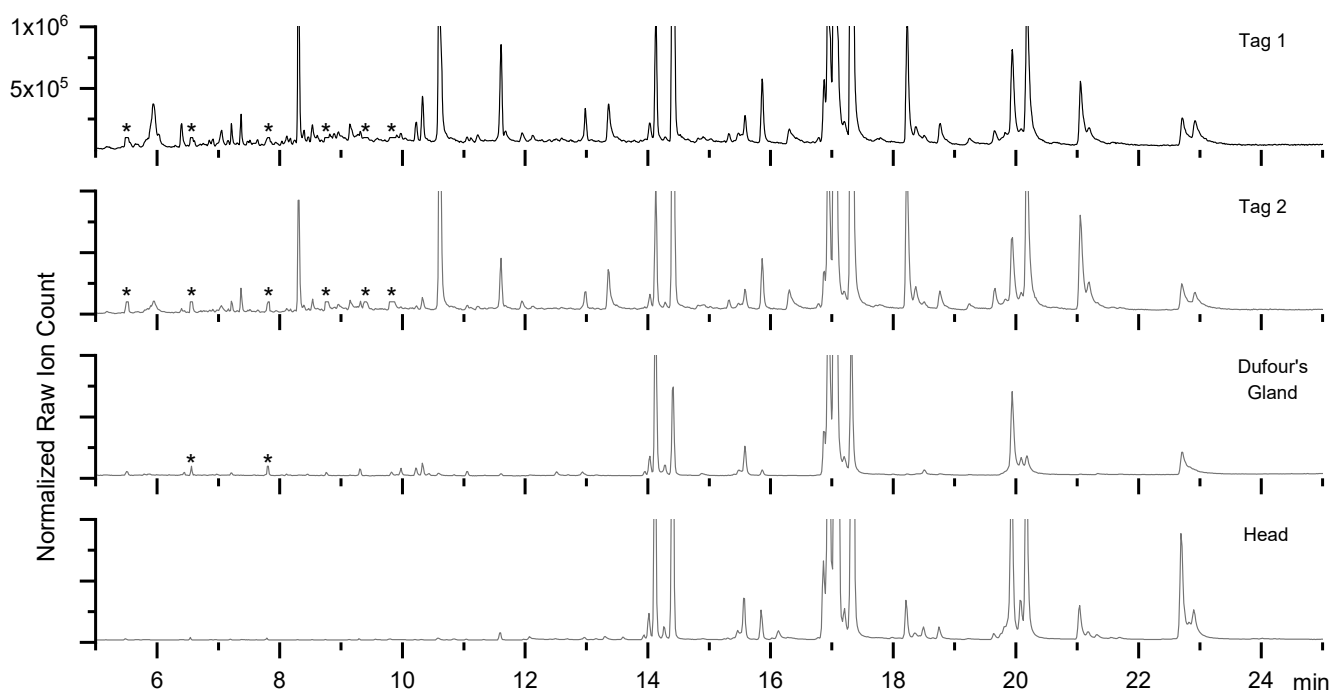

**Figure S2.** The juxtaposition of the normalized chromatograms of the four-sample set from *O. cornuta* female C11 (see Figure S1). Chromatograms were scaled to  $1 \times 10^6$  to also show smaller compounds. Asterisks indicate matrix compounds that were clipped of for clarity of presentation.

**Table S2.** Quantity of substances found in different origins of volatiles. Only substances detectable in a sufficient number of samples were considered. The sum of all peak areas was normalized to  $1 \times 10^7$  for each sample prior to calculating the mean and standard deviation. As in the tube, only a fraction of substances were found, and the sample peak sum was normalized to  $4 \times 10^5$  to retain comparability (estimated by peaks originating from the solvent and GC column).

| ID | Tag              | Head            |                         | Gland           |                         | Nest Mark       |                         | Tube            |                 |
|----|------------------|-----------------|-------------------------|-----------------|-------------------------|-----------------|-------------------------|-----------------|-----------------|
|    |                  | nq <sup>1</sup> | mean $\pm$ sd           | nq <sup>1</sup> | mean $\pm$ sd           | nq <sup>1</sup> | mean $\pm$ sd           | nq <sup>1</sup> | mean $\pm$ sd   |
| 3  | C17:0            | 0               | 1.412 $\pm$ 312         | 0               | 13.133 $\pm$ 13.591     | 0               | 17.321 $\pm$ 5.266      | 3               |                 |
| 4  | C15:0-Ald        | 25              |                         | 25              |                         | 0               | 16.325 $\pm$ 7.697      | 3               |                 |
| 6  | C14:0-EE         | 25              |                         | 0               | 5.214 $\pm$ 2.801       | 0               | 915 $\pm$ 1.003         | 3               |                 |
| 7  | C16:0-Ald        | 0               | 816 $\pm$ 366           | 0               | 3.574 $\pm$ 5.164       | 0               | 123.558 $\pm$ 62.293    | 0               | 578 $\pm$ 243   |
| 8  | Met-C15-2-one    | 23              | 61 $\pm$ 236            | 0               | 5.333 $\pm$ 2.820       | 38              | 432 $\pm$ 794           | 3               |                 |
| 10 | 9-C19:1          | 0               | 206 $\pm$ 380           | 23              | 218 $\pm$ 947           | 0               | 1.833 $\pm$ 3.125       | 0               | 125 $\pm$ 95    |
| 11 | 7-C19:1          | 0               | 136 $\pm$ 96            | 17              | 880 $\pm$ 1.546         | 0               | 4.476 $\pm$ 2.700       | 0               | 1.166 $\pm$ 400 |
| 12 | C19:0            | 0               | 2.795 $\pm$ 2.372       | 0               | 4.731 $\pm$ 5.467       | 0               | 25.214 $\pm$ 30.591     | 0               | 687 $\pm$ 235   |
| 14 | C17:0-Ald        | 12              | 230 $\pm$ 298           | 25              |                         | 0               | 32.670 $\pm$ 17.027     | 2               | 86 $\pm$ 149    |
| 16 | 9-C16:1-EE       | 25              |                         | 0               | 13.497 $\pm$ 6.202      | 20              | 926 $\pm$ 1.027         | 3               |                 |
| 17 | C16:0-EE         | 25              |                         | 0               | 4.781 $\pm$ 3.534       | 0               | 915 $\pm$ 1.108         | 3               |                 |
| 18 | 9-C16:1-IPE      | 11              | 403 $\pm$ 517           | 0               | 8.306 $\pm$ 9.979       | 0               | 15.391 $\pm$ 11.146     | 3               |                 |
| 19 | Met-HC 1         | 25              |                         | 0               | 6.897 $\pm$ 3.559       | 51              | 6 $\pm$ 47              | 3               |                 |
| 20 | C16:0-IPE        | 20              | 390 $\pm$ 1.293         | 0               | 6.706 $\pm$ 6.471       | 0               | 15.921 $\pm$ 9.595      | 0               | 3.014 $\pm$ 742 |
| 21 | C18:0-Ald        | 0               | 2.878 $\pm$ 1.197       | 10              | 5.440 $\pm$ 6.132       | 0               | 380.533 $\pm$ 190.228   | 3               |                 |
| 22 | 9-C21:1          | 0               | 496 $\pm$ 1.126         | 15              | 513 $\pm$ 1.046         | 4               | 1.477 $\pm$ 1.637       | 0               | 223 $\pm$ 69    |
| 23 | 7-C21:1          | 0               | 995 $\pm$ 369           | 0               | 3.195 $\pm$ 1.841       | 0               | 1.423 $\pm$ 1.101       | 0               | 253 $\pm$ 297   |
| 24 | 9,12-C18:2-ME    | 8               | 149 $\pm$ 132           | 25              |                         | 25              | 848 $\pm$ 1.995         | 3               |                 |
| 25 | C21:0            | 0               | 36.998 $\pm$ 36.960     | 0               | 21.618 $\pm$ 14.922     | 0               | 118.923 $\pm$ 60.217    | 0               | 2.515 $\pm$ 450 |
| 26 | C21:0-One        | 0               | 2.237 $\pm$ 9.860       | 19              | 356 $\pm$ 1.057         | 0               | 11.133 $\pm$ 28.153     | 3               |                 |
| 27 | C19:0-Ald        | 25              |                         | 25              |                         | 0               | 7.867 $\pm$ 3.114       | 3               |                 |
| 28 | 9-C18:1-OOH      | 0               | 15.860 $\pm$ 14.910     | 0               | 4.325 $\pm$ 4.895       | 0               | 1.226 $\pm$ 999         | 3               |                 |
| 29 | 9,12-C18:2-EE    | 25              |                         | 24              | 453 $\pm$ 2.266         | 51              | 33 $\pm$ 236            | 3               |                 |
| 30 | C18:1-EE         | 25              |                         | 0               | 10.578 $\pm$ 5.681      | 13              | 1.308 $\pm$ 1.660       | 3               |                 |
| 31 | C18:0-EE         | 14              | 34 $\pm$ 44             | 0               | 1.831 $\pm$ 1.611       | 0               | 711 $\pm$ 913           | 3               |                 |
| 32 | C22:0            | 0               | 5.814 $\pm$ 3.292       | 0               | 5.869 $\pm$ 2.126       | 0               | 23.813 $\pm$ 7.225      | 0               | 2.025 $\pm$ 454 |
| 33 | C20:0-Ald        | 10              | 1.444 $\pm$ 1.497       | 25              |                         | 0               | 61.003 $\pm$ 26.077     | 3               |                 |
| 35 | 9-C20:1-1-OH     | 0               | 3.899 $\pm$ 1.407       | 0               | 9.505 $\pm$ 4.171       | 0               | 2.389 $\pm$ 1.130       | 3               |                 |
| 36 | 9-C23:1          | 0               | 38.294 $\pm$ 7.824      | 0               | 71.698 $\pm$ 21.349     | 0               | 32.699 $\pm$ 39.995     | 3               |                 |
| 37 | 7-C23:1          | 0               | 441.519 $\pm$ 131.923   | 0               | 831.316 $\pm$ 299.661   | 0               | 240.790 $\pm$ 99.852    | 3               |                 |
| 38 | Met-HC 2         | 25              |                         | 0               | 7.202 $\pm$ 3.641       | 46              | 165 $\pm$ 512           | 3               |                 |
| 39 | 5-C23:1          | 0               | 16.720 $\pm$ 5.087      | 0               | 35.648 $\pm$ 12.913     | 0               | 10.279 $\pm$ 5.067      | 3               |                 |
| 40 | C23:0            | 0               | 577.822 $\pm$ 122.651   | 0               | 478.860 $\pm$ 157.263   | 0               | 790.774 $\pm$ 125.127   | 0               | 3.830 $\pm$ 108 |
| 41 | C21:0-Ald        | 24              | 44 $\pm$ 220            | 25              |                         | 0               | 7.012 $\pm$ 4.318       | 3               |                 |
| 42 | C20:1-EE         | 25              |                         | 24              | 232 $\pm$ 1.160         | 50              | 39 $\pm$ 216            | 3               |                 |
| 43 | 9-C24:1          | 0               | 15.291 $\pm$ 3.671      | 0               | 21.724 $\pm$ 7.677      | 0               | 11.428 $\pm$ 4.640      | 3               |                 |
| 44 | 7-C24:1          | 0               | 83.283 $\pm$ 11.756     | 0               | 130.965 $\pm$ 23.635    | 0               | 49.135 $\pm$ 17.290     | 3               |                 |
| 45 | C24:0            | 0               | 63.609 $\pm$ 6.611      | 0               | 44.177 $\pm$ 11.149     | 0               | 79.978 $\pm$ 9.318      | 0               | 3.470 $\pm$ 326 |
| 46 | 9,12-C18:2-BE    | 0               | 1.346 $\pm$ 1.488       | 24              | 11 $\pm$ 53             | 46              | 32 $\pm$ 115            | 3               |                 |
| 47 | 9,12,15-C18:3-BE | 0               | 8.030 $\pm$ 9.967       | 25              |                         | 52              |                         | 3               |                 |
| 48 | C22:0-Ald        | 7               | 2.233 $\pm$ 2.058       | 23              | 349 $\pm$ 1.250         | 0               | 52.603 $\pm$ 24.112     | 2               | 92 $\pm$ 159    |
| 49 | 9-C22:1-1-OH     | 0               | 52.041 $\pm$ 28.238     | 0               | 92.033 $\pm$ 44.886     | 0               | 40.945 $\pm$ 28.189     | 3               |                 |
| 50 | 9-C25:1          | 0               | 536.599 $\pm$ 112.707   | 0               | 681.634 $\pm$ 149.345   | 0               | 333.820 $\pm$ 130.569   | 2               | 122 $\pm$ 211   |
| 51 | 7-C25:1          | 0               | 3.632.199 $\pm$ 355.500 | 0               | 4.589.903 $\pm$ 546.294 | 0               | 1.915.463 $\pm$ 614.592 | 0               | 1.189 $\pm$ 443 |

| ID | Tag          | Head            |                         | Gland           |                       | Nest Mark       |                         | Tube            |                     |
|----|--------------|-----------------|-------------------------|-----------------|-----------------------|-----------------|-------------------------|-----------------|---------------------|
|    |              | nq <sup>1</sup> | mean $\pm$ sd           | nq <sup>1</sup> | mean $\pm$ sd         | nq <sup>1</sup> | mean $\pm$ sd           | nq <sup>1</sup> | mean $\pm$ sd       |
| 52 | 5-C25:1      | 0               | 30.713 $\pm$ 3.668      | 0               | 41.948 $\pm$ 10.273   | 0               | 17.635 $\pm$ 7.853      | 3               |                     |
| 53 | C25:0        | 0               | 2.040.344 $\pm$ 249.085 | 0               | 979.304 $\pm$ 270.559 | 0               | 1.767.645 $\pm$ 324.140 | 0               | 5.390 $\pm$ 2.051   |
| 54 | 9-C23:1-1-OH | 0               | 66.426 $\pm$ 40.419     | 0               | 9.716 $\pm$ 10.620    | 0               | 169.883 $\pm$ 78.484    | 0               | 388 $\pm$ 259       |
| 55 | 9-C26:1      | 0               | 7.587 $\pm$ 2.646       | 0               | 6.513 $\pm$ 3.100     | 0               | 8.468 $\pm$ 4.057       | 3               |                     |
| 56 | 7-C26:1      | 0               | 32.411 $\pm$ 6.003      | 0               | 36.449 $\pm$ 8.615    | 0               | 17.794 $\pm$ 7.627      | 3               |                     |
| 57 | C26:0        | 0               | 41.654 $\pm$ 6.157      | 0               | 16.315 $\pm$ 6.266    | 0               | 40.464 $\pm$ 8.148      | 0               | 1.961 $\pm$ 899     |
| 58 | C24:0-Ald    | 10              | 1.524 $\pm$ 1.715       | 23              | 1.775 $\pm$ 6.672     | 0               | 24.612 $\pm$ 14.522     | 3               |                     |
| 59 | Met-HC 3     | 0               | 10.418 $\pm$ 8.376      | 22              | 533 $\pm$ 1.724       | 0               | 22.973 $\pm$ 13.410     | 2               | 104 $\pm$ 180       |
| 60 | 9-C24:1-1-OH | 0               | 7.874 $\pm$ 4.232       | 0               | 7.296 $\pm$ 4.147     | 0               | 5.423 $\pm$ 4.876       | 3               |                     |
| 61 | 9-C27:1      | 0               | 31.759 $\pm$ 16.801     | 0               | 49.587 $\pm$ 75.830   | 0               | 29.217 $\pm$ 25.942     | 3               |                     |
| 62 | 7-C27:1      | 0               | 476.430 $\pm$ 65.716    | 0               | 511.565 $\pm$ 76.002  | 0               | 247.167 $\pm$ 92.823    | 3               |                     |
| 63 | 5-C27:1      | 0               | 82.901 $\pm$ 16.911     | 0               | 78.944 $\pm$ 24.136   | 0               | 34.619 $\pm$ 18.162     | 3               |                     |
| 64 | C27:0        | 0               | 743.772 $\pm$ 97.150    | 0               | 219.833 $\pm$ 80.842  | 0               | 502.110 $\pm$ 120.199   | 0               | 2.560 $\pm$ 1.191   |
| 65 | Met-HC 4     | 0               | 80.450 $\pm$ 51.478     | 0               | 7.329 $\pm$ 9.325     | 0               | 150.556 $\pm$ 80.616    | 0               | 516 $\pm$ 327       |
| 66 | Met-HC 5     | 0               | 16.794 $\pm$ 13.047     | 13              | 1.146 $\pm$ 1.893     | 0               | 25.833 $\pm$ 19.110     | 3               |                     |
| 67 | 7-C28:1      | 0               | 17.951 $\pm$ 4.604      | 0               | 18.410 $\pm$ 6.005    | 0               | 8.245 $\pm$ 4.643       | 3               |                     |
| 68 | C28:0        | 0               | 9.803 $\pm$ 2.925       | 0               | 2.691 $\pm$ 1.597     | 0               | 8.596 $\pm$ 5.250       | 0               | 767 $\pm$ 299       |
| 69 | 9-C26:1-1-OH | 11              | 1.794 $\pm$ 3.716       | 25              |                       | 0               | 3.178 $\pm$ 3.322       | 2               | 47 $\pm$ 81         |
| 70 | 9-C29:1      | 0               | 2.501 $\pm$ 1.408       | 10              | 660 $\pm$ 1.075       | 0               | 3.918 $\pm$ 4.153       | 2               | 68 $\pm$ 118        |
| 71 | 7-C29:1      | 0               | 387.498 $\pm$ 68.853    | 0               | 333.176 $\pm$ 105.781 | 0               | 177.633 $\pm$ 81.385    | 3               |                     |
| 72 | 5-C29:1      | 0               | 48.179 $\pm$ 16.946     | 0               | 53.671 $\pm$ 24.299   | 0               | 17.507 $\pm$ 8.364      | 3               |                     |
| 73 | C29:0        | 0               | 132.169 $\pm$ 28.558    | 0               | 18.640 $\pm$ 12.906   | 0               | 87.696 $\pm$ 48.464     | 0               | 17.589 $\pm$ 10.793 |
| 74 | 7-C31:1      | 0               | 110.075 $\pm$ 50.977    | 0               | 44.956 $\pm$ 27.486   | 0               | 30.524 $\pm$ 20.476     | 3               |                     |
| 75 | C31:0        | 0               | 35.922 $\pm$ 11.300     | 14              | 2.465 $\pm$ 3.229     | 0               | 15.860 $\pm$ 9.072      | 0               | 1.028 $\pm$ 551     |

<sup>1</sup> nq = number of samples where substance was not quantifiable

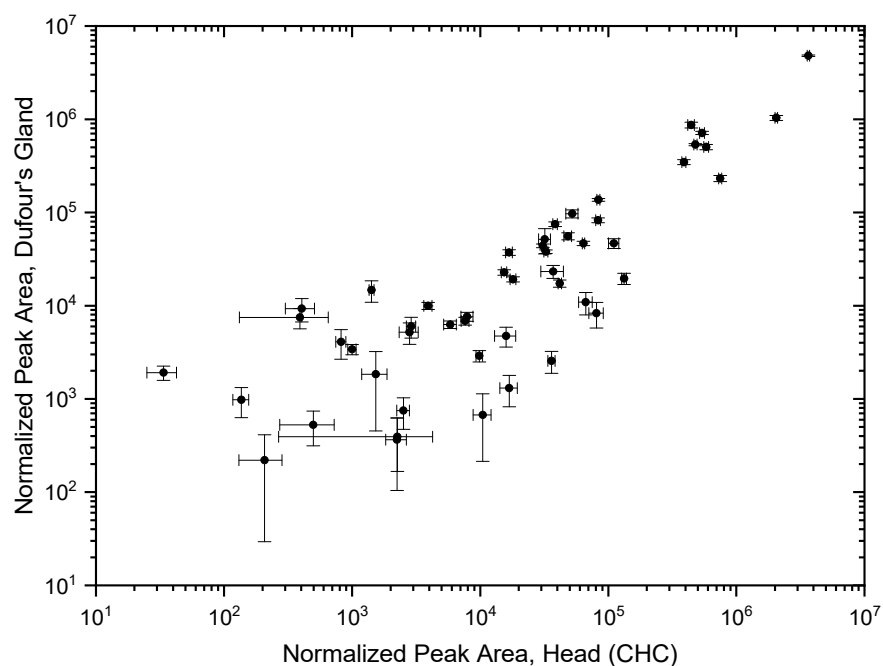

**Figure S3.** Correlation of the mean amounts  $\pm$  sd (based on the largest diagnostic fragment) of 51 substances found both in Dufour's gland and in head extracts of *O. cornuta* females. Please note the logarithmic scale of axes.
